# Supplementary material for: Improved ordering and lubricating properties using graphene in lamellar liquid crystals of Triton X-100/CnmimNTf2/H2O
Source: Royal Society of Chemistry journal article supplement (doi:10.1039/c9sm02181g), 2020-01-01
Supplement: c9sm02181g1.pdf [file c9sm02181g1.pdf]

## Supporting Information

# Improved Ordering and Lubricating Properties by Graphene on Lamellar Liquid Crystals of Triton X- 100/C<sub>n</sub>mimNTf<sub>2</sub>/H<sub>2</sub>O

*Liping Chen<sup>a, b</sup>, Lei Fan<sup>a,\*</sup>, Lingling Ge<sup>a</sup> and Rong Guo<sup>a,\*</sup>*

<sup>a</sup>School of Chemistry and Chemical Engineering, Yangzhou University, Yangzhou 225002, P. R. China.

E-mail: fanlei@yzu.edu.cn; guorong@yzu.edu.cn

<sup>b</sup>Department of Chemical Engineering, Yangzhou Polytechnic Institute, Yangzhou 225127, P. R. China.

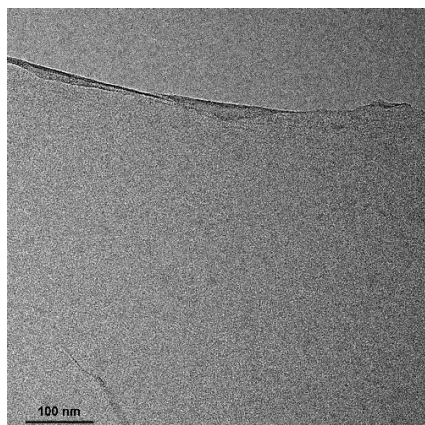

**Figure. S1** TEM images of graphene nanosheets

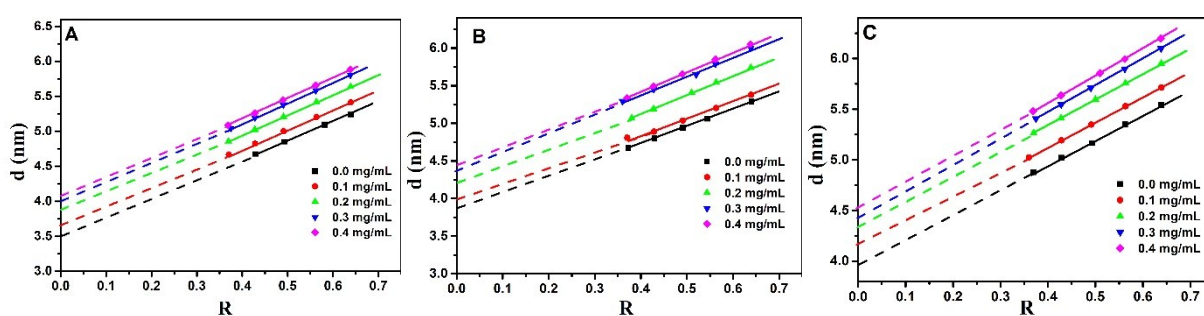

**Figure. S2** Dependence of the interlayer thickness  $d$  on water content  $R$  in the graphene/Triton X-100/ $C_n$ mimNTf<sub>2</sub>/H<sub>2</sub>O LLCs systems with different graphene content (A)  $n=8$ , (B)  $n=12$ , and (C)  $n=16$ .

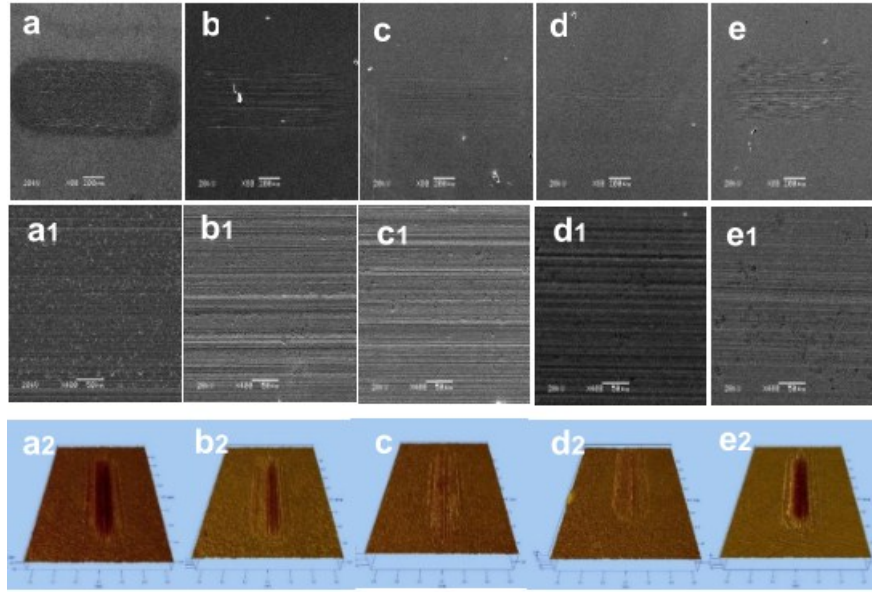

**Figure S3.** SEM and 3D images of the worn surfaces of the samples lubricated by LLCs doped with various concentrations of graphene at room temperature (a: 0 mg/mL; b: 0.10 mg/mL; c: 0.20 mg/mL; d: 0.30 mg/mL; e: 0.40 mg/mL; a<sub>1</sub>, b<sub>1</sub>, c<sub>1</sub>, d<sub>1</sub> and e<sub>1</sub> are enlarged images corresponding to a, b, c, d and e, respectively; a<sub>2</sub>, b<sub>2</sub>, c<sub>2</sub>, d<sub>2</sub> and e<sub>2</sub> are 3D images corresponding to a, b, c, d and e, respectively).
